# Supplementary material for: Detection of Drug-Drug Interactions by Modeling Interaction Profile Fingerprints
Source: PLoS One. 2013 Mar 8;8(3):e58321. doi: 10.1371/journal.pone.0058321 (PMC3592896; doi:10.1371/journal.pone.0058321)
Supplement: Table S4 — Evaluation of a random set of 100 interactions with TC ≥ 0.4 (test set C). (XLSX) [file pone.0058321.s004.xlsx]

## Sheet: Table S4
Table S4. Evaluation of a random set of 100 interactions with TC ³ 0.4 predicted by the model (these interactions are not in the training set). DrugA (column B) is predicted to interact with drugB (column D) because drugC is similar to drugA, causing a similar effect than drugC-drugB. The interactions were evaluated according to Drugdex (Micromedex) database and drugs.com database (www.drugs.com)…
Number	DrugA	DrugC: similar to DrugA	DrugB	TC	Correct DDI according to drugs.com and/or drugdex databases (1 means correct, 0 means not found in the databases)	DDI effect (to interpret the interaction, drugC should be substituted by drugA. Only the effect for the correct interactions was evaluated.)	Correct effect confirmed in drugs.com or Drugdex (1 means correct, 0 means incorrect or not coincident with the consulted databases)
1	Methylphenobarbital	Methohexital	Triprolidine	0.875	0	--	--
2	Scopolamine	Benztropine	Rivastigmine	0.875	1	Possible antagonism of action	1
3	Benztropine	Oxybutynin	Carbamazepine	0.778	1	Oxybutynin may cause carbamazepine toxicity	0
4	Toremifene	Ziprasidone	Ketoconazole	0.761	1	Ketoconazole increases the effect and toxicity of ziprasidone	1
5	Trazodone	Tramadol	Thioridazine	0.754	1	Thioridazine may decrease the effect of Tramadol by decreasing active metabolite production.	0
6	Triamcinolone	Prednisolone	Itraconazole	0.729	1	The imidazole, itraconazole, may increase the effect and toxicity of the corticosteroid, prednisolone.	1
7	Pindolol	Propranolol	Maprotiline	0.712	1	Propranolol increases the serum levels of maprotiline	0
8	Pirbuterol	Fenoterol	Carteolol	0.711	1	Antagonism	1
9	Anisindione	Warfarin	Etonogestrel	0.707	0	--	--
10	Anisindione	Warfarin	Nandrolone/phenpropionate	0.707	1	Nandrolone may increase the serum concentration and anticoagulant effect of warfarin. Monitor for changes in prothrombin time and therapeutic effects of warfarin if nandrolone is initiated, discontinued or dose changed.	1
11	Phendimetrazine	Phentermine	Ethopropazine	0.7	0	--	--
12	Vincristine	Tiagabine	Mefloquine	0.697	0	--	--
13	Nadolol	Metoprolol	Primidone	0.679	0	--	--
14	Naproxen	Diclofenac	Rifampin	0.667	0	--	--
15	Nalidixic/Acid	Gemcitabine	Paclitaxel	0.667	1	Paclitaxel increases the effect/toxicity of gemcitabine	0
16	Clidinium	Oxybutynin	Carbamazepine	0.667	0	--	--
17	Cephapirin	Thalidomide	Triprolidine	0.667	0	--	--
18	Fluvoxamine	Fluoxetine	Cyproheptadine	0.644	1	Possible antagonism of action	1
19	Tadalafil	Teniposide	Quinupristin	0.639	0	--	--
20	Altretamine	Metaraminol	Guanethidine	0.625	0	--	--
21	Phenylephrine	Dopamine	Phenytoin	0.615	0	--	--
22	Dexfenfluramine	Phenylpropanolamine	Pargyline	0.614	1	Increased arterial pressure	1
23	Foscarnet	Isradipine	Tipranavir	0.611	0	--	--
24	Moclobemide	Phenelzine	Methamphetamine	0.61	1	Possible hypertensive crisis	1
25	Perphenazine	Chlorpromazine	Vorinostat	0.6	0	--	--
26	Lumefantrine	Zuclopenthixol	Lopinavir	0.592	1	Lopinavir, a strong CYP2D6 inhibitor, may increase the serum concentration of zuclopenthixol by decreasing its metabolism. Consider alternate therapy or monitor for changes in the therapeutic and adverse effects of zuclopenthixol if lopinavir is initiated, discontinued or dose changed.	1
27	Trimethobenzamide	Tacrine	Pilocarpine	0.591	0	--	--
28	Tamsulosin	Tolterodine	Galantamine	0.588	0	--	--
29	Tolterodine	Tamsulosin	Methadone	0.588	1	Methadone, a CYP2D6 inhibitor, may decrease the metabolism and clearance of Tamsulosin, a CYP2D6 substrate. Monitor for changes in therapeutic/adverse effects of Tamsulosin if Methadone is initiated, discontinued, or dose changed.	0
30	Spironolactone	Drospirenone	Artemether	0.571	0	--	--
31	Salmeterol	Glipizide	Tolbutamide	0.571	0	--	--
32	Lumiracoxib	Flurbiprofen	Torasemide	0.562	0	--	--
33	Prazosin	Clonidine	Imipramine	0.559	1	The tricyclic antidepressant, imipramine, decreases the effect of clonidine.	0
34	Perindopril	Moexipril	Quinupristin	0.556	0	--	--
35	Tadalafil	Zolpidem	Fluconazole	0.553	1	Fluconazole, a strong CYP3A4 inhibitor, may increase the serum concentration of zolpidem by decreasing its metabolism. Consider alternate therapy or monitor for changes in the therapeutic and adverse effects of zolpidem if fluconazole is initiated, discontinued or dose changed.	1
36	Isradipine	Droperidol	Trospium	0.55	0	--	--
37	Phenelzine	Tranylcypromine	S-Adenosylmethionine	0.546	0	--	--
38	Timolol	Metoprolol	Primidone	0.543	1	The barbiturate decreases the effect of metabolized beta-blocker	1
39	Zolmitriptan	Venlafaxine	Voriconazole	0.541	0	--	--
40	Toremifene	Tacrolimus	Nelfinavir	0.54	1	The protease inhibitor, nelfinavir, may increase the effect and toxicity of tacrolimus.	1
41	Betaxolol	Labetalol	Cimetidine	0.537	1	Cimetidine may increase the serum concentration of labetolol by decreasing its metabolism.	1
42	Divalproex/sodium	Betamethasone	Rifampin	0.535	1	The enzyme inducer, rifampin, may decrease the effect of the corticosteroid, betamethasone.	1
43	Flecainide	Procainamide	Quinidine	0.531	1	Quinidine increases the effect of procainamide	1
44	Grepafloxacin	Gatifloxacin	Thiothixene	0.531	0	--	--
45	Succinylcholine	Atracurium	Fosphenytoin	0.529	1	Phenytoin decreases the effect of muscle relaxant	0
46	Triamcinolone	Divalproex/sodium	Nimodipine	0.523	0	--	--
47	Mephenytoin	Fosphenytoin	Atracurium	0.517	1	Phenytoin decreases the effect of muscle relaxant	1
48	Estradiol	Felodipine	Erythromycin	0.514	1	Erythromycin increases the effect of felodipine	0
49	Moxifloxacin	Norfloxacin	Tramadol	0.513	1	Norfloxacin may increase Tramadol toxicity by decreasing Tramadol metabolism and clearance.	0
50	Heptabarbital	Primidone	Anisindione	0.509	0	--	--
51	Chlorpromazine	Thioridazine	Astemizole	0.506	1	Increased risk of cardiotoxicity and arrhythmias	1
52	Ethotoin	Phenytoin	Praziquantel	0.504	0	--	--
53	Miconazole	Isoniazid	Mephenytoin	0.5	1	Isoniazid increases the effect of phenytoin in 20% of patients	1
54	Sucralfate	Iron	Doxycycline	0.5	0	--	--
55	Dolasetron	Flupenthixol	Galantamine	0.5	0	--	--
56	Tacrolimus	Ziprasidone	Rotigotine/Transdermal/Patch	0.493	0	--	--
57	Isoniazid	Nicardipine	Treprostinil	0.49	0	--	--
58	Maprotiline	Protriptyline	Phenylephrine	0.48	0	--	--
59	Paroxetine	Fluvoxamine	Theophylline	0.478	1	Fluvoxamine increases the effect and toxicity of theophylline	1
60	Conjugated/Estrogens	Divalproex/sodium	Meropenem	0.474	0	--	--
61	Vinblastine	Temsirolimus	Efavirenz	0.472	1	Efavirenz may increase the metabolism of Temsirolimus decreasing its efficacy. Concomitant therapy should be avoided.	1
62	Droperidol	Maprotiline	Desvenlafaxine	0.467	1	Increased risk of serotonin syndrome. Monitor for symptoms of serotonin syndrome.	0
63	Amprenavir	Atazanavir	Protriptyline	0.465	1	Atazanavir may increase the effect and toxicity of the tricyclic antidepressant, protriptyline, by decreasing its metabolism. Monitor for changes in the therapeutic and adverse effects of protriptyline if atazanavir if initiated, discontinued or dose changed.	1
64	Pipobroman	Methysergide	Nitroglycerin	0.462	0	--	--
65	Trimipramine	Tramadol	Pyrimethamine	0.451	0	--	--
66	Vinorelbine	Temsirolimus	Oxcarbazepine	0.451	1	Oxcarbazepine may increase the metabolism of Temsirolimus decreasing its efficacy. Concomitant therapy should be avoided.	1
67	Selegiline	Procarbazine	Methotrexate	0.45	0	--	--
68	Formoterol	Indomethacin	Probenecid	0.45	0	--	--
69	Galantamine	Tacrine	Prednisone	0.448	0	--	--
70	Zolmitriptan	Trazodone	Lidocaine	0.444	0	--	--
71	Allopurinol	Orlistat	Vitamin/E	0.444	0	--	--
72	Epinastine	Orphenadrine	Docetaxel	0.444	0	--	--
73	Clarithromycin	Ketoconazole	Imipramine	0.44	1	Ketoconazole, a moderate CYP2D6 inhibitor, may increase the serum concentration of imipramine by increasing its metabolism. Monitor for changes in the therapeutic and adverse effects of imipramine if ketoconazole is initiated, discontinued or dose changed.	0
74	Clarithromycin	Ketoconazole	Pioglitazone	0.44	1	Ketoconazole increases the effect of pioglitazone	1
75	Trimipramine	Tacrolimus	Paromomycin	0.434	0	--	--
76	Imatinib	Fosamprenavir	Ergotamine	0.432	1	Amprenavir increases the effect and toxicity of ergot derivative	1
77	Fosamprenavir	Imatinib	Nifedipine	0.432	1	Imatinib increases the effect and toxicity of nifedipine	1
78	Bevantolol	Carvedilol	Fluoxetine	0.432	0	--	--
79	Itraconazole	Atazanavir	Dihydroxyaluminium	0.43	1	This gastric pH modifier decreases the levels/effects of atazanavir	1
80	Mezlocillin	Dicloxacillin	Dicumarol	0.429	1	Dicloxacillin may decrease the anticoagulant effect of dicumarol.	0
81	Lumiracoxib	Ketoprofen	Citalopram	0.429	0	--	--
82	Desloratadine	Molindone	Tetrabenazine	0.429	0	--	--
83	Betamethasone	Norethindrone	Pioglitazone	0.426	0	--	--
84	Phenobarbital	Phenytoin	Vecuronium	0.424	0	--	--
85	Ketoconazole	Fluconazole	Cyclophosphamide	0.422	0	--	--
86	Simvastatin	Midazolam	Mephenytoin	0.422	0	--	--
87	Glycodiazine	Chlorpropamide	Sulfadoxine	0.421	0	--	--
88	Allopurinol	Fenoprofen	Telmisartan	0.417	0	--	--
89	Molindone	Cyclobenzaprine	Tranylcypromine	0.417	1	Increased risk of serotonin syndrome. Concomitant use should be avoided. These agents should not be administered within 14 days of each other.	0
90	Carbenicillin	Ticarcillin	Tobramycin	0.412	1	Ticarcillin may reduce the serum concentration of Tobramycin. Ticarcillin may inactivate Tobramycin in vitro and the two agents should not be administered simultaneously through the same IV line.	1
91	Posaconazole	Imatinib	Nifedipine	0.41	1	Imatinib increases the effect and toxicity of nifedipine	1
92	Posaconazole	Imatinib	Josamycin	0.41	0	--	--
93	Ziprasidone	Trimipramine	Duloxetine	0.409	1	Increased risk of serotonin syndrome. Monitor for symptoms of serotonin syndrome.	0
94	Thiothixene	Trimipramine	Buspirone	0.405	1	Increased risk of serotonin syndrome. Monitor for symptoms of serotonin syndrome.	0
95	Indomethacin	Repaglinide	Clarithromycin	0.404	0	--	--
96	Ritonavir	Itraconazole	Ranitidine	0.403	0	--	--
97	Trifluoperazine	Mesoridazine	Dofetilide	0.403	1	Increased risk of cardiotoxicity and arrhythmias	1
98	Flecainide	Maprotiline	Tranylcypromine	0.4	0	--	--
99	Ethosuximide	Busulfan	Metronidazole	0.4	0	--	--
100	Maraviroc	Moricizine	Diltiazem	0.4	1	Increased effect/toxicity of moricizine	1
